# Supplementary material for: Unveiling the Novel Benefits of Co-Administering Butyrate and Active Vitamin D3 in Mice Subjected to Chemotherapy-Induced Gut-Derived Pseudomonas aeruginosa Sepsis
Source: MDPI journal article supplement (doi:10.3390/biomedicines12051026), 2024-05-07
Supplement: s1 [file s1]

Figure S1. Experimental protocol

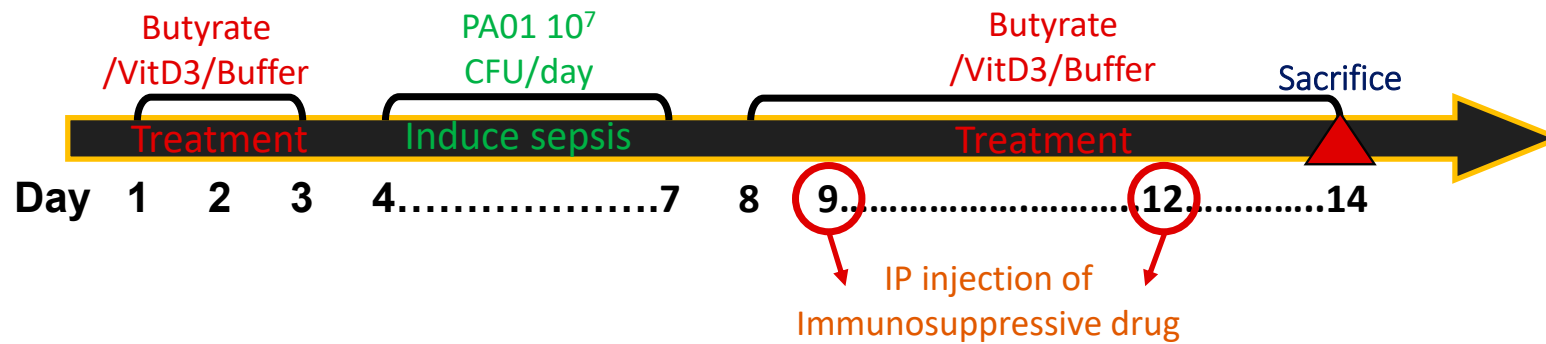

Postbiotics: 20 mg sodium butyrate/kg mice per day  
VitD3: 0.2 µg /25 g mice per day  
Buffer: 1xPBS (used as vehicle)  
PAO1: 10<sup>7</sup> CFU *Pseudomonas aeruginosa* PAO1-LAC  
Immunosuppressive drug: 4 mg/20 g mice  
cyclophosphamide
